# Supplementary material for: Validity of the Polar Vantage M watch when measuring heart rate at different exercise intensities
Source: PeerJ. 2021 Feb 9;9:e10893. doi: 10.7717/peerj.10893 (PMC7879937; doi:10.7717/peerj.10893)
Supplement: Supplemental Information 1 [file peerj-09-10893-s001.xlsx]

## Sheet: Sheet2
	ECG	Polar
S0

## Sheet: Sheet1
participant	BMI	Height	Weight	Age	Max_HR	Resting_HR	Day1_Stage0_Polar	Day2_Stage0_Polar	Day1_Stage0_ECG	Day2_Stage0ECG	Diff_ECG_Stage0	Day1_Stage0_ECGpercHRMax	Day1_Stage1_Polar	Day2_Stage1_Polar	Day1_Stage1_ECG	Day2_Stage1_ECG	Diff_ECG_Stage1	Day1_Stage1_ECGpercHRMax	Day1_Stage2_Polar	Day2_Stage2_Polar	Day1_Stage2_ECG	Day2_Stage2_ECG	Diff_ECG_Stage2	Day1_Stage2_ECGpercHRMax	Day1_Stage3_Polar	Day2_Stage3_Polar	Day1_Stage3_ECG	Day2_Stage3_ECG	Diff_ECG_Stage3	Day1_Stage3_ECGpercHRMax	Day1_Stage4_Polar	Day2_Stage4_Polar	Day1_Stage4_ECG	Day2_Stage4_ECG	Diff_ECG_Stage4	Day1_Stage4_ECGpercHRMax	Day1_Stage5_Polar	Day2_Stage5_Polar	Day1_Stage5_ECG	Day2_Stage5_ECG	Diff_ECG_Stage5	Day1_Stage5_ECGpercHRMax	Day1_Stage6_Polar	Day2_Stage6_Polar	Day1_Stage6_ECG	Day2_Stage6_ECG	Day1_Stage6_ECGpercHRMax	Day1_Stage7_Polar	Day2_Stage7_Polar
1	27.83	1.76	82.2	26	194	75.33	97	100	99.5	100	-0.5	51.2887	109	108	110	116	-6	56.701	125	108	114.5	134	-19.5	59.0206	156	148.5	158.5	162	-3.5	81.701	184.5	188	185.5	189	-3.5	95.6186	190.5	192	191	192.5	-1.5	98.4536
2	26.79	1.84	90.7	25	195	78.17	83.5	83.5	88	82	6	45.1282	104	98	101	84	17	51.7949	110	114	110.5	105	5.5	56.6667	137	140	137	141	-4	70.2564	169	169.5	168.5	171	-2.5	86.4103	160	159.5	189	188	1	96.9231	162	161	194	191	99.4872
3	24.3	1.68	68.6	33	187	74.83	83.5	109.5	99.5	97.5	2	53.2086	110	97	114	103.5	10.5	60.9626	132	121.5	134.5	125	9.5	71.9251	161.5	156.5	161	158	3	86.0963	178.5	178	179	180	-1	95.7219
4	27.7	1.77	86.8	26	194	84.83	95.5	89	98	93.5	4.5	50.5155	85.5	89	116.5	103.5	13	60.0515	95	132.5	133	139.5	-6.5	68.5567	117	125	173	179.5	-6.5	89.1753	140.5	148	189	194.5	-5.5	97.4227
5	19.54	1.79	62.6	23	197	64.67	93	82	71.5	73.5	-2	36.2944	87	90	89	84	5	45.1777	100	95.5	101	104.5	-3.5	51.269	124	126	131	123	8	66.4975	149.5	163	164	159.5	4.5	83.2487	152.5	165.5	171	163	8	86.802
6	22.44	1.77	70.3	24	196	60	83	83	74	82.5	-8.5	37.7551	94.5	98	95	95.5	-0.5	48.4694	107	99.5	106	114.5	-8.5	54.0816	135.5	122.5	136.5	145.5	-9	69.6429	176.5	181.5	178	182.5	-4.5	90.8163	192	192	193	193	0	98.4694
7	23.59	1.67	65.8	23	197	60.5	81	87.5	77.5	77.5	0	39.3401	93.5	98.5	92	97	-5	46.7005	111.5	116	112.5	120	-7.5	57.1066	155.5	110	160.5	160.5	0	81.4721	184	176	185	184.5	0.5	93.9086	189	190	189	191	-2	95.9391
8	25.66	1.78	81.3	23	197	72.67	100	90	94.5	86	8.5	47.9695	107.5	98	107.5	92.5	15	54.5685	131.5	107.5	131	121	10	66.4975	168	159	170.5	161.5	9	86.5482	194	192	193.5	193	0.5	98.2234
9	25.14	1.71	73.5	28	192	68	95	92	90	88	2	46.875	104.5	109	104	107	-3	54.1667	119	114	122	116.5	5.5	63.5417	145	143	146	144.5	1.5	76.0417	176.5	176	176	177	-1	91.6667	190.5	191	190.5	191	-0.5	99.2188
10	27.8	1.73	83.2	31	189	90	99	94.5	99	95	4	52.381	111	106.5	109.5	109	0.5	57.9365	131	126.5	130	126.5	3.5	68.7831	157	157	158	163	-5	83.5979	186	185	187	187	0	98.9418
11	21.3	1.88	75.3	35	185	65.83	77	73	72.5	74	-1.5	39.1892	90.5	82	87.5	90	-2.5	47.2973	101	103.5	102	98	4	55.1351	134.5	135	135.5	137	-1.5	73.2432	165	165	165.5	165	0.5	89.4595	179	180	179	180.5	-1.5	96.7568	174	182	181	183	97.8378
12	23.2	1.73	69.3	32	188	70	74.5	84	69	75.5	-6.5	36.7021	93	88	85.5	85	0.5	45.4787	100	103	105	103.5	1.5	55.8511	135.5	133.5	137.5	131.5	6	73.1383	172	172	172.5	173.5	-1	91.7553	180	178.5	181	183	-2	96.2766
13	22.28	1.68	62.9	24	196	71	107	96.5	104	98	6	53.0612	108	105	114.5	106	8.5	58.4184	125	115.5	129	118	11	65.8163	163	160.5	163	157	6	83.1633	181.5	179	182	180	2	92.8571	185	187.5	185	188.5	-3.5	94.3878
14	22.12	1.78	70.1	22	198	83	97	92.5	105.5	93.5	12	53.2828	115.5	111	122.5	118	4.5	61.8687	129.5	117.5	140.5	142	-1.5	70.9596	127.5	168	176	170.5	5.5	88.8889	182.5	182	188	187	1	94.9495
15	23.14	1.77	72.5	24	196	80	92	106	83.5	85.5	-2	42.602	90.5	87.5	97	98	-1	49.4898	101	93	108	109.5	-1.5	55.102	135	135.5	137.5	138	-0.5	70.1531	165.5	159.5	164.5	164.5	0	83.9286	184.5	182	185	183	2	94.3878	190.5	190	190.5	191	97.1939
16	25.3	1.75	77.5	26	194	74.16	87	91	92.5	92	0.5	47.6804	113	112	115.5	113	2.5	59.5361	141	135	140.5	134.5	6	72.4227	162	116	178.5	176	2.5	92.0103	191	145.5	191.5	188	3.5	98.7113
17	20.51	1.68	57.9	24	196	71.16	82.5	96.5	81.5	90.5	-9	41.5816	91.5	90.5	102.5	105.5	-3	52.2959	111.5	109	114.5	129.5	-15	58.4184	132	120.5	146	156.5	-10.5	74.4898	169.5	140.5	180	182	-2	91.8367	178	174.5	190	192.5	-2.5	96.9388
18	19.24	1.65	52.4	24	196	61.33	87	79	90	71	19	45.9184	84	92.5	76	89.5	-13.5	38.7755	104.5	108	105	110	-5	53.5714	140	140.5	141.5	141.5	0	72.1939	171.5	170	172	171.5	0.5	87.7551	165	172	181.5	182.5	-1	92.602
19	28.06	1.7	81.1	25	195	65.9	132.5	94.5	89	84.5	4.5	45.641	109.5	96	104.5	104	0.5	53.5897	111	107	123.5	123.5	0	63.3333	119.5	153	166	163	3	85.1282	165	165	194	194.5	-0.5	99.4872
20	22.12	1.67	61.7	23	197	87.5	104.5	111	105.5	111.5	-6	53.5533	114	145	123.5	131	-7.5	62.6904	147	145	147	152.5	-5.5	74.6193	177	127	179	181.5	-2.5	90.8629	181.5	131	191.5	192.5	-1	97.2081
22	20.83	1.8	67.5	25	195	64.67	76	98	71	76	-5	36.4103	82	94.5	83	79.5	3.5	42.5641	94.5	97.5	99	101.5	-2.5	50.7692	134	127.5	134.5	130	4.5	68.9744	177	146	178	177	1	91.2821	158	153.5	191	192	-1	97.9487
23	22.37	1.65	60.9	24	196	75.33	97	85	86.5	81.5	5	44.1327	106.5	106	101.5	106	-4.5	51.7857	122	108	120	114	6	61.2245	114	109	152.5	152.5	0	77.8061	181	184.5	185.5	185.5	0	94.6429	195	195.5	195.5	196	-0.5	99.7449
24	28	1.84	94.7	25	195	54	94	76.5	77	86.5	-9.5	39.4872	117.5	89.5	91.5	90	1.5	46.9231	107.5	90	103.5	112.5	-9	53.0769	103	103.5	143	142	1	73.3333	147	167.5	173.5	172	1.5	88.9744	153.5	177.5	187.5	178	9.5	96.1538
25	26.46	1.89	94.5	22	198	67.83	85.5	80.5	82	77.5	4.5	41.4141	87.5	84.5	101	91.5	9.5	51.0101	91.5	88.5	119	116.5	2.5	60.101	104	105.5	154	142.5	11.5	77.7778	154.5	155.5	179	175.5	3.5	90.404	181.5	179.5	183	183	0	92.4242
26	26.26	1.65	71.5	29	191	71.67	89	93.5	93	93.5	-0.5	48.6911	110	109.5	109.5	108.5	1	57.3298	122.5	127.5	123.5	128.5	-5	64.6597	156.5	161	158.5	162	-3.5	82.9843	184.5	162	185	186.5	-1.5	96.8586
27	21.61	1.71	63.2	31	189	76.12	90	86.5	90	86.5	3.5	47.619	99	105.5	108	105.5	2.5	57.1429	121.5	97	120	97	23	63.4921	148	148.5	149	148.5	0.5	78.836	166.5	167	166.5	167	-0.5	88.0952
28	23.23	1.81	76.1	28	192	69.17	87.5	114.5	84	83	1	43.75	111	114.5	95	97	-2	49.4792	104.5	112.5	106	114	-8	55.2083	109	105	140	142.5	-2.5	72.9167	149	136	174	173	1	90.625	159	156	191	188.5	2.5	99.4792
29	26.54	1.87	92.8	26	194	85.67	94.5	87.5	94	85	9	48.4536	105	99	107	105.5	1.5	55.1546	117.5	108.5	120	108.5	11.5	61.8557	140.5	134	140	137	3	72.1649	162.5	156.5	164	160	4	84.5361	178	172	178	171.5	6.5	91.7526	182.5	181	183.5	181.5	94.5876
30	27.77	1.73	83.1	27	193	44.3	81	78.5	73.5	61	12.5	38.0829	92	84	85	81.5	3.5	44.0415	92	104	97.5	105.5	-8	50.5181	117.5	136	134.5	139	-4.5	69.6891	170	172	170	173.5	-3.5	88.0829	174	163	183.5	187	-3.5	95.0777	165	164	185	190	95.8549
															0.53						0.61
[truncated: 10 more columns]
